# Supplementary material for: NANOG Reporter Cell Lines Generated by Gene Targeting in Human Embryonic Stem Cells
Source: PubMed Central journal article supplement (PMC2932718; doi:10.1371/journal.pone.0012533), 2010-09-02

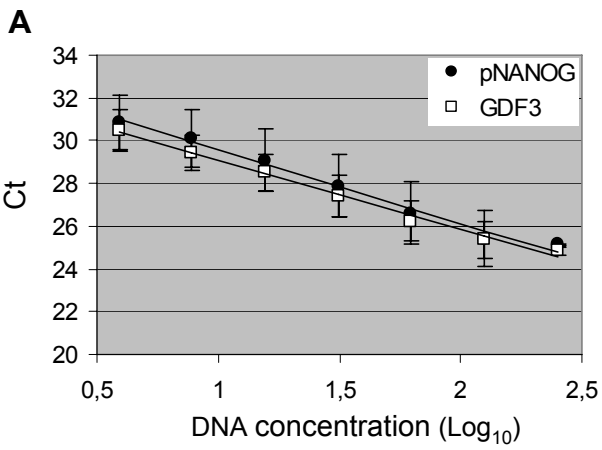

$$R^2_{\text{pNANOG}} = 0.99 \quad R^2_{\text{GDF3}} = 0.99$$

$$y_{\text{pNANOG}} = -3.4 \quad y_{\text{GDF3}} = -3.2$$

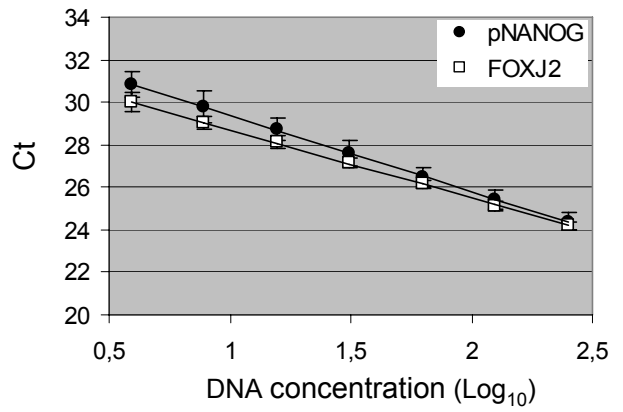

$$R^2_{\text{pNANOG}} = 0.99 \quad R^2_{\text{FOXJ2}} = 0.99$$

$$y_{\text{pNANOG}} = -3.6 \quad y_{\text{FOXJ2}} = -3.2$$

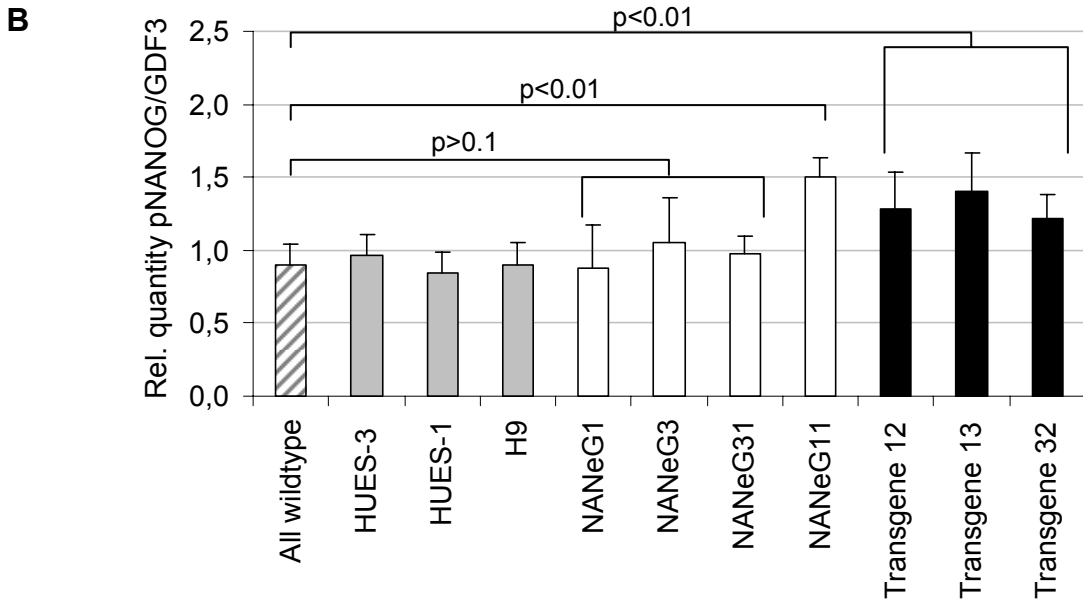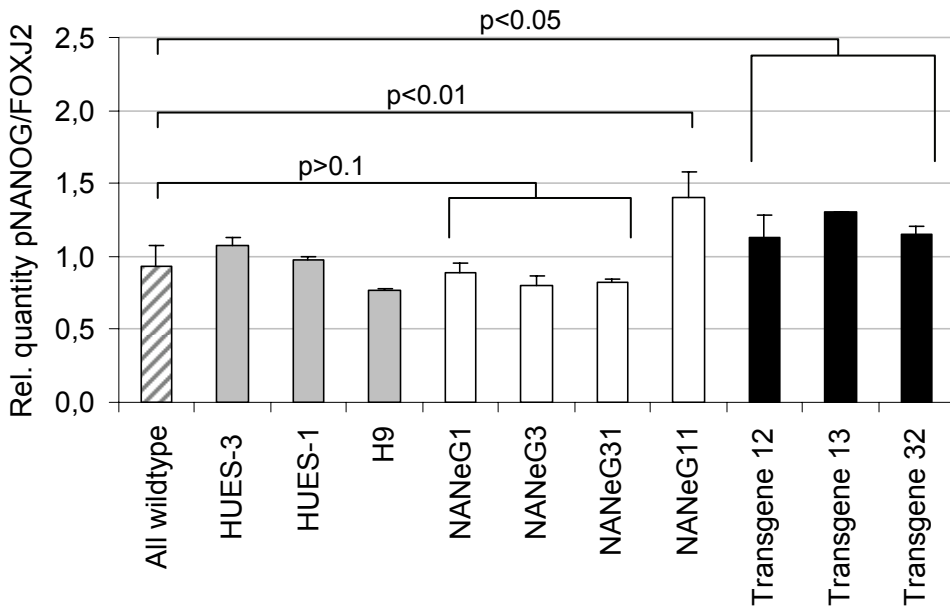

Supplement: pone.0012533.s003.pdf [file pone.0012533.s003.pdf]
