# Supplementary material for: NANOG Reporter Cell Lines Generated by Gene Targeting in Human Embryonic Stem Cells
Source: PubMed Central journal article supplement (PMC2932718; doi:10.1371/journal.pone.0012533), 2010-09-02

**A**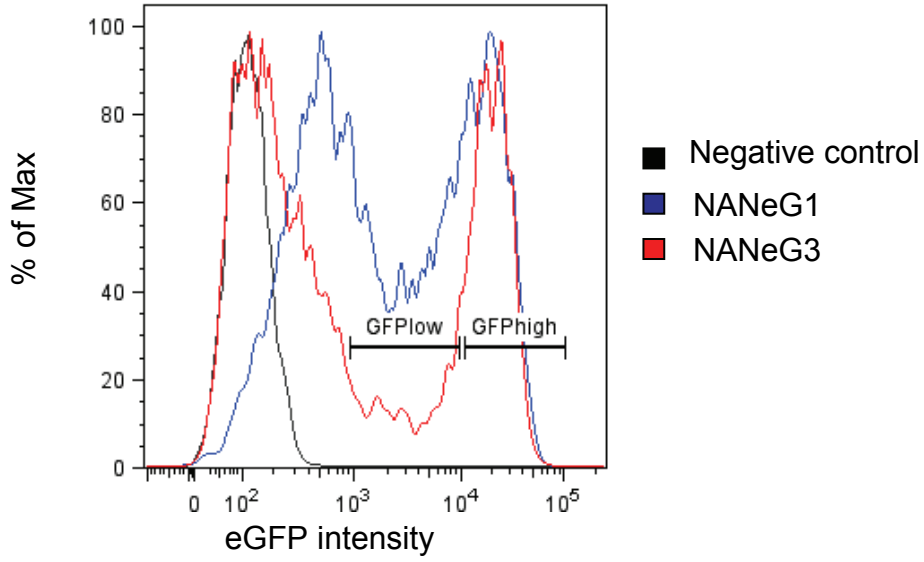**B**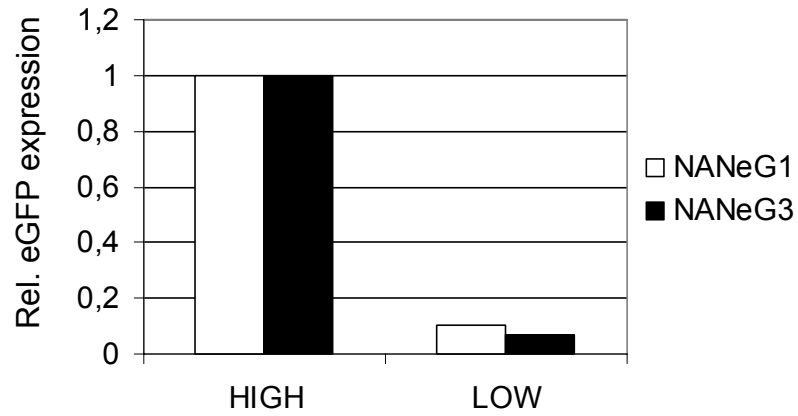

Supplement: pone.0012533.s004.pdf [file pone.0012533.s004.pdf]
